# Supplementary material for: Combined Tumor-Based BRCA1/2 and TP53 Mutation Testing in Ovarian Cancer
Source: MDPI journal article supplement (doi:10.3390/ijms241411570), 2023-07-18
Supplement: s1 [file s1]

Supplementary Table S1: *BRCA1/2* unclassified variants identified on tumor testing and their respective LOH analysis.

| Patient | Gene  | Variant      | Protein         | Functional domain  | Impact         | Allelic frequency | LOH          | Germine variant | TP53 associated mutation   | Allelic frequency | Other associated variants                                             |
|---------|-------|--------------|-----------------|--------------------|----------------|-------------------|--------------|-----------------|----------------------------|-------------------|-----------------------------------------------------------------------|
| P2      | BRCA2 | c.8645A>C    | p.Lys2882Thr    | Tower              | Missense       | 0,14              | No           | No              | c.711G>A ;p.Met237Ile      | 0,54              | No                                                                    |
| P3      | BRCA2 | c.6322C>T    | p.Arg2108Cys    | -                  | Missense       | 0,48              | No           | No              | c.832 ; p.Pro278Ser        | 0,59              | No                                                                    |
| P4      | BRCA2 | c.8351G>A    | p.Arg2784Gln    | OB1                | Missense       | 0,86              | Yes          | No              | c.517G>A;p.Val173Met       | 0,89              | UV<br>ATR:c.7167T>G;p.Ile2389Met                                      |
| P9      | BRCA1 | c.5096G>A    | p.Arg1699Gln    | BRCT1/AD2          | Missense       | 0,79              | Yes          | Yes             | c.722G>T;p.Glu258*         | 0,72              | No                                                                    |
| P12     | BRCA1 | c.287_292del | p.Asp96_Gly98de | Ring finger ° NES2 | Small deletion | 0,57              | No           | No              | c.833_834insC; p.Gly279fs. | 0,87              | No                                                                    |
| P15     | BRCA2 | c.6757C>G    | p.Leu2253Val    | -                  | Missense       | 0,15              | No           | No              | c.702C>A; p.Tyr234*        | 0,68              | UV ATM:<br>c.4388T>G;p.Phe1463Cys<br>UV<br>ATM:c.6919C>T;p.Leu2307Phe |
| P20     | BRCA1 | c.1616C>T    | p.Thr539Met     | -                  | Missense       | 0,45              | No           | Yes             | Non-contributory           | Non-contributory  | NR                                                                    |
| P23     | BRCA2 | c.955A>T     | p.Asn319Tyr     | -                  | Missense       | 0,19              | Yes          | Yes             | c.518T>G;p.Val173Gly       | 0,44              | NR                                                                    |
| P25     | BRCA2 | c.8435G>T    | p.Gly2812Val    | OB2                | Missense       | 0,10              | inconclusive | No              | NR                         | NR                | NR                                                                    |
| P28     | BRCA2 | c.1096T>G    | p.Leu366Val     | -                  | Missense       | 0,18              | Yes          | No              | c.202G>T ; p.Glu68*        | 0,45              | NR                                                                    |
| P31     | BRCA2 | c.122C>T     | p.Pro41Leu      | -                  | Missense       | 0,42              | No           | No              | c.814G>A;p.Val272Met       | 0,66              | No                                                                    |
| P38     | BRCA1 | c.5165C>T    | p.Ser1722Phe    | BRCT1/AD2          | Missense       | 0,41              | Yes          | Yes             | c.782+1G>A                 | 0,21              | NF1:c.6854_6855insA,p.Tyr2285_Asn2286fs                               |
| P39     | BRCA2 | c.1607C>A    | p.Ser536Tyr     | -                  | Missense       | 0,50              | inconclusive | Oui             | No                         | WT                | NR                                                                    |
| P40     | BRCA2 | c.9586A>G    | p.Lys3196Glu    | -                  | Missense       | 0,45              | No           | Yes             | c.309C>G ; p.Tyr103*       | 0,14              | No                                                                    |

|     |       |            |              |                |            |      |              |              |                                  |              |                                                                      |
|-----|-------|------------|--------------|----------------|------------|------|--------------|--------------|----------------------------------|--------------|----------------------------------------------------------------------|
| P43 | BRCA1 | c.508C>T   | p.Arg170Trp  | -              | Missense   | 0,16 | Yes          | Yes          | c.645T>G ; p.Ser215Arg           | 0,70         | No                                                                   |
| P54 | BRCA1 | c.300G>A   | p.Glu100=    | -              | synonymous | 0,08 | inconclusive | inconclusive | c.584T>C;p.Ile195Thr             | 0,30         | UV<br>ATM:c.6068G>T;p.Gly2023Val<br>UV<br>NF1:c.4749A>G;p.Glu1583Glu |
| P55 | BRCA2 | c.7534C>T  | p.Leu2512Phe | Helical domain | Missense   | 0,46 | No           | Yes          | c.657_668del;p.Pro219_Pro223del  | 0,32         | No                                                                   |
| P56 | BRCA2 | c.7791A>T  | p.Lys2597Asn | Helical domain | Missense   | 0,03 | Yes          | NR           | c.464C>A;p.Thr155Asn             | 0,0211       | No                                                                   |
| P59 | BRCA2 | c.1275A>G  | p.Glu425=    | -              | Missense   | 0,57 | inconclusive | NR           | c.670G>T; p.Glu224*              | 0,87         | UV ATM:c.4258C>T; p.Leu1420Phe                                       |
| P11 | BRCA2 | c.856T>C   | p.Ser286Pro  | -              | Missense   | 0,3  | Yes          | No           | c.351delG; p.Gly117fs            | 0,29         | BRCA1:c.5266_5267insC; p.Gln1756_Asp1757fs                           |
| P61 | BRCA2 | c.6317T>C  | p.Leu2106Pro | -              | Missense   | 0,49 | inconclusive | NR           | c.856_861del; p.Glu286_Glu287del | 0,19         | UV ATM:c.1118C>G;p.Thr373Arg                                         |
| P62 | BRCA2 | c.4928T>C  | p.Val1643Ala | -              | Missense   | 0,40 | Yes          | Yes          | c.224delC;p.Pro75fs              | Not reported |                                                                      |
| P50 | BRCA2 | c.2133C>T  | p.Cys711=    | -              |            | 0,72 | Yes          | No           | c.403T>G; p.Cys135Gly            | 0,62         | UV NF1:c.369C>G;p.Thr123Thr<br>BRCA1:c.4072G>T ; p.Glu1358*          |
| P47 | BRCA2 | c.10121C>T | p.Thr3374Ile | -              | Missense   | 0,71 | inconclusive | NR           | c.1010G>T ; p.Arg337Leu          | 0,52         | BRCA1 c.3008_3009del                                                 |
| P64 | BRCA2 | c.7719A>G  | p.Leu2573=   | Helical domain |            | 0,57 | inconclusive | inconclusive |                                  | No           | ATM:c.609C>T;p.Asp203Asp                                             |

NR : not reported

Supplementary Table S2: List of *TP53* pathogenic mutations identified on tumor testing and their corresponding allelic frequency.

| Patient | <i>TP53</i> mutation                      | Variant localization | Variant type | Variant frequency | Immunohistochemistry |
|---------|-------------------------------------------|----------------------|--------------|-------------------|----------------------|
| P1      | c.743 G>A;p.Arg248Gln                     | Exon 7               | Missense     | 0,8               | NR                   |
| P2      | c.657_668del;p.Pro219_Pro223del           | Exon 6               | Frameshift   | 0,32              | Positive             |
| P3      | c.375+1G>T; p.?                           | Intron 4             | Splicing     | 0,45              | NR                   |
| P4      | c.97-1G>C ; p.?                           | Intron 3             | Splicing     | 0,15              | NR                   |
| P5      | c.468_469insCCGGCACCCGC;p.Arg156_Val157fs | Exon 5               | Frameshift   | 0,32              | Negative             |
| P6      | c.711G>A p.Met237Ile                      | Exon 7               | Missense     | 0,54              | Positive             |
| P7      | c.517G>A;p.Val173Met                      | Exon 5               | Missense     | 0,59              | Positive             |
| P8      | c.672+1G>A; p.?                           | Intron 6             | Splicing     | 0,15              | Negative             |
| P9      | c.527G>A;p.Cys176Tyr                      | Exon 5               | Missense     | 0,89              | Positive             |
| P10     | c.976G>T;p.Glu326*                        | Exon 9               | Nonsense     | 0,73              | Positive             |
| P11     | c.394A>G ; p.Lys132Glu                    | Exon 5               | Missense     | 0,63              | NR                   |
| P12     | c.809T>C; p.Phe270Ser                     | Exon 8               | Missense     | 0,53              | NR                   |

|     |                                        |          |            |              |          |
|-----|----------------------------------------|----------|------------|--------------|----------|
| P13 | c.673-1G>C; p.?                        | Intron 6 | Splicing   | 0,55         | Negative |
| P14 | c.464C>A;p.Thr155Asn                   | Exon 5   | Missense   | 0,0211       | NR       |
| P15 | c.307_308insGAAAACCT;p.Tyr103_Gln104fs | Exon 4   | Frameshift | 0,32         | Negative |
| P16 | c.262delG; p.Ala88fs                   | Exon 4   | Frameshift | 0,68         | Negative |
| P17 | c.742C>T;p.Arg248Trp                   | Exon 7   | Missense   | 0,57         | Positive |
| P18 | c.587G>C;p.Arg196Pro                   | Exon 6   | Missense   | 0,68         | Positive |
| P19 | c.764T>G; p.Ile255Thr                  | Exon 7   | Missense   | 0,48         | NR       |
| P20 | c.120_126del; p.Met40fs                | Exon 4   | Frameshift | 0,59         | Negative |
| P21 | c.742C>T; p.Arg248Trp                  | Exon 7   | Missense   | 0,91         | Positive |
| P22 | c.722G>T;p.Glu258*                     | Exon 7   | Nonsense   | 0,72         | Positive |
| P23 | c.638G>T;p.Arg213Leu                   | Exon 6   | Missense   | 0,52         | NR       |
| P24 | c.406C>T;p.Gln136*                     | Exon 5   | Nonsense   | 0,39         | NR       |
| P25 | c.524 G>A;p.Arg175His                  | Exon 5   | Missense   | 0,66         | Positive |
| P26 | c.743 G>A;p.Arg248Gln                  | Exon 7   | Missense   | 0,64         | Positive |
| P27 | c.338T>C;p.Phe113Ser                   | Exon 4   | Missense   | 0,32         | Positive |
| P28 | c.257_279del;p.Ala86fs                 | Exon 4   | Frameshift | 0,52         | NR       |
| P29 | c.455_456insC; p.Pro152_Pro153fs       | Exon 5   | Frameshift | 0,47         | Negative |
| P30 | c.670G>T; p.Glu224*                    | Exon 6   | Nonsense   | 0,87         | NR       |
| P31 | c.524 G>A;p.Arg175His                  | Exon 5   | Missense   | 0,92         | Positive |
| P32 | c.578A>T;p.His193Leu                   | Exon 6   | Missense   | 0,24         | NR       |
| P33 | c.559+1G>T ; p.?                       | Intron 5 | Splicing   | 0,1          | Negative |
| P34 | c.863del;p.Asn288fs                    | Exon 8   | Frameshift | 0,42         | Positive |
| P35 | c.775_776insG;p.Asp259_Ser260fs        | Exon 7   | Frameshift | 0,8          | NR       |
| P36 | c.351del; p.Gly117fs                   | Exon 4   | Frameshift | 0,29         | NR       |
| P37 | c.701A>G;p.Tyr234Cys                   | Exon 7   | Missense   | 0,7          | NR       |
| P38 | c.464C>A;p.Thr155Asn                   | Exon 5   | Missense   | 0,59         | NR       |
| P39 | c.581T>C;p.Leu194Pro                   | Exon 6   | Missense   | 0,59         | Positive |
| P40 | c.713G>A;p.Cys238Tyr                   | Exon 7   | Missense   | 0,5          | Positive |
| P41 | c.393_395del;p.Asn131_Lys132del        | Exon 5   | Frameshift | 0,6          | NR       |
| P42 | c.833_834insC ; p.Gly279fs             | Exon 8   | Frameshift | Not reported | Negative |
| P43 | c.542G>C;p.Arg181Pro                   | Exon 5   | Missense   | 0,93         | Positive |
| P44 | c.766A>C;p.Thr256Pro                   | Exon 7   | Missense   | 0,57         | Positive |
| P45 | c.569del;p.Pro190fs                    | Exon 6   | Frameshift | 0,60         | NR       |

|     |                                 |          |            |              |          |
|-----|---------------------------------|----------|------------|--------------|----------|
| P46 | c.856_861del;p.Glu286_Glu287del | Exon 8   | Frameshift | 0,19         | Positive |
| P47 | c.403T>C;p.Cys135Arg            | Exon 5   | Missense   | 0,18         | Positive |
| P48 | c.840A>C;p.Arg280Ser            | Exon 8   | Missense   | 0,62         | NR       |
| P49 | c.702C>A;p.Tyr234*              | Exon 7   | Nonsense   | 0,68         | Negative |
| P50 | c.526T>A;p.Cys176Ser            | Exon 5   | Missense   | Not reported | Positive |
| P51 | c.613T>G;p.Tyr205Asp            | Exon 6   | Missense   | 0,38         | NR       |
| P52 | c.646G>A;p.Val216Met            | Exon 6   | Missense   | 0,22         | Positive |
| P53 | c.375+5del;p.?                  | Intron 4 | Splicing   | 0,057        | Positive |
| P54 | c.475G>C;p.Ala159Pro            | Exon 5   | Missense   | 0,07         | Positive |
| P55 | c.518T>C;p.Val173Ala            | Exon 5   | Missense   | 0,09         | NR       |
| P56 | c.527G>A;p.Cys176Tyr            | Exon 5   | Missense   | 0,01         | Positive |
| P57 | c.672+1G>A;p.?                  | Intron 6 | Splicing   | 0,75         | Negative |
| P58 | c.743G>A;p.Arg248Gln            | Exon 7   | Missense   | 0,61         | Positive |
| P59 | c.517G>T;p.Val173Leu            | Exon 5   | Missense   | 0,43         | Positive |
| P60 | c.422G>A;p.Cys141Tyr            | Exon 5   | Missense   | 0,29         | NR       |
| P61 | c.224del;p.Pro75fs              | Exon 4   | Frameshift | Not reported | Negative |
| P62 | c.743 G>A;p.Arg248Gln           | Exon 7   | Missense   | 0,22         | NR       |
| P63 | c.1049T>C;p.Leu350Pro           | Exon 10  | Missense   | 0,48         | NR       |
| P64 | c.517G>A;p.Val173Met            | Exon 5   | Missense   | 0,82         | Positive |
| P65 | c.832C>T;p.Pro278Ser            | Exon 8   | Missense   | 0,59         | Positive |
| P66 | c.713G>A;p.Cys238Tyr            | Exon 7   | Missense   | 0,71         | NR       |
| P67 | c.527G>T;p.Cys176Phe            | Exon 5   | Missense   | 0,44         | Positive |
| P68 | c.518T>G;p.Val173Gly            | Exon 5   | Missense   | 0,44         | Positive |
| P69 | c.625A>T;p.Arg209*              | Exon 6   | Nonsense   | 0,61         | Negative |
| P70 | c.490A>G; p.Lys164Glu           | Exon 5   | Missense   | 0,35         | Positive |
| P71 | c.455_456insC;p.Pro152_Pro153fs | Exon 5   | Frameshift | 0,63         | NR       |
| P72 | c.983del;p.Phe328fs             | Exon 9   | Frameshift | 0,47         | Negative |
| P73 | c.824G>T;p.Cys275Phe            | Exon 8   | Missense   | Not reported | Positive |
| P74 | c.711G>A;p.Met237Ile            | Exon 7   | Missense   | 0,62         | Positive |
| P75 | c.146delA;p.Asp49fs             | Exon 4   | Frameshift | 0,36         | Positive |
| P76 | c.742 C>T;p.Arg248Trp           | Exon 7   | Missense   | 0,40         | Positive |
| P77 | c.742C>T;p.Arg248Trp            | Exon 7   | Missense   | 0,15         | NR       |
| P78 | c.470T>G;p.Val157Gly            | Exon 5   | Missense   | 0,35         | Positive |

|      |                                        |          |            |              |          |
|------|----------------------------------------|----------|------------|--------------|----------|
| P79  | c.856G>T;p.Glu286*                     | Exon 8   | Nonsense   | 0,78         | NR       |
| P80  | c.916C>T ; p.Arg306*                   | Exon 8   | Nonsense   | 0,48         | Positive |
| P81  | c.373A>C;p.Thr125Pro                   | Exon 4   | Missense   | 0,74         | NR       |
| P82  | c.395A>G;p.Lys132Arg                   | Exon 5   | Missense   | 0,27         | Positive |
| P83  | c.818G>A;p.Arg273His                   | Exon 8   | Missense   | 0,2          | Positive |
| P84  | c.488_489insTA;p.Lys164fs              | Exon 5   | Frameshift | 0,79         | NR       |
| P85  | c.150T>A;p.Ile50Ile p.Glu51Lysfs*67    | Exon 4   | Nonsense   | 0,14         | Negative |
| P85  | c.151_166delGAACAATGGTTCACTG;p.Glu51fs | Exon 4   | Frameshift | 0,14         | Negative |
| P86  | c.202G>T ; p.Glu68*                    | Exon 4   | Nonsense   | 0,45         | Negative |
| P87  | c.1024C>T ; p.Arg342*                  | Exon 10  | Nonsense   | 0,59         | Negative |
| P88  | c.584T>C;p.Ile195Thr                   | Exon 6   | Missense   | 0,30         | NR       |
| P89  | c.583A>T;p.Ile195Phe                   | Exon 6   | Missense   | 0,07         | NR       |
| P90  | c.402T>G;p.Phe134Leu                   | Exon 5   | Missense   | 0,84         | NR       |
| P91  | c.994-1G>A;p.?                         | Intron 9 | Splicing   | 0,11         | NR       |
| P92  | c.839G>C;p.Arg280Thr                   | Exon 8   | Missense   | 0,47         | Positive |
| P93  | c.833C>T;p.Pro278Leu                   | Exon 8   | Missense   | 0,76         | Positive |
| P94  | c.586C>T;p.Arg196*                     | Exon 6   | Nonsense   | 0,67         | Positive |
| P95  | c.707A>G;p.Tyr236Cys                   | Exon 7   | Missense   | 0,48         | Negative |
| P96  | c.542_559+6del;p.?                     | Exon 5   | Splicing   | 0,26         | Positive |
| P97  | c.934dup ; p.Thr312fs                  | Exon 9   | Frameshift | 0,61         | Negative |
| P98  | c.711G>A ; p.Met237Ile                 | Exon 7   | Missense   | 0,39         | NR       |
| P99  | c.388C>T;p.Leu130Phe                   | Exon 5   | Missense   | 0,02         | NR       |
| P100 | c.524 G>A ; p.Arg175His                | Exon 5   | Missense   | 0,83         | NR       |
| P101 | c.586C>T, p.Arg196*                    | Exon 6   | Nonsense   | 0,20         | Positive |
| P102 | c.614A>G;p.Tyr205Cys                   | Exon 6   | Missense   | 0,54         | NR       |
| P103 | c.844C>T;p.Arg282Trp                   | Exon 8   | Missense   | 0,81         | Positive |
| P104 | c.574C>T; p.Gln92*                     | Exon 6   | Nonsense   | 0,85         | Positive |
| P105 | c.747G>T;p.Arg249Ser                   | Exon 7   | Missense   | 0,04         | NR       |
| P106 | c.681_682insT;p.Ser227_Asp228fs        | Exon 7   | Frameshift | 0,42         | Positive |
| P107 | c.216_217insC;p.Pro72fs                | Exon 4   | Frameshift | 0,69         | Negative |
| P108 | c.403T>G;p.Cys135Gly                   | Exon 5   | Missense   | 0,62         | Negative |
| P109 | c.818_827del; p.Arg273fs               | Exon 8   | Frameshift | Not reported | NR       |
| P110 | c.450_473del;p.Thr150_Arg158del        | Exon 5   | Frameshift | 0,53         | Positive |

|      |                                   |          |            |      |          |
|------|-----------------------------------|----------|------------|------|----------|
| P111 | c.783-1_784delinsCTT;p.?          | Intron 7 | Splicing   | 0,20 | NR       |
| P112 | c.818_827del;p.Arg273fs           | Exon 8   | Frameshift | 0,25 | Negative |
| P113 | c.380C>T;p.Ser127Phe              | Exon 5   | Missense   | 0,62 | NR       |
| P114 | c.814G>A;p.Val272Met              | Exon 8   | Missense   | 0,66 | Positive |
| P115 | c.824G>A;p.Cys275Tyr              | Exon 8   | Missense   | 0,62 | NR       |
| P116 | c.524G>A;p.Arg175His              | Exon 5   | Missense   | 0,47 | Positive |
| P117 | c.644G>T;p.Ser215Ile              | Exon 6   | Missense   | 0,05 | NR       |
| P118 | c.422G>A;p.Cys141Tyr              | Exon 5   | Missense   | 0,68 | NR       |
| P119 | c.517G>T ; p.Val173Leu            | Exon 5   | Missense   | 0,02 | Positive |
| P120 | c.586C>T;p.ARG196*                | Exon 6   | Nonsense   | 0,26 | NR       |
| P121 | c.659A>G;p.Tyr220Cys              | Exon 6   | Missense   | 0,22 | NR       |
| P122 | c.151delG;p.Glu51fs               | Exon 4   | Frameshift | 0,52 | NR       |
| P123 | c.817 C>T; p.Arg273Cys            | Exon 8   | Missense   | 0,16 | Negative |
| P124 | c.394A>G;p.Lys132Glu              | Exon 5   | Missense   | 0,15 | Positive |
| P125 | c.159_198del;p.Trp53fs            | Exon 4   | Frameshift | 0,15 | NR       |
| P126 | c.782+1G>A                        | Intron 7 | Splicing   | 0,21 | NR       |
| P127 | c.742 C>T;p.Arg248Trp             | Exon 7   | Missense   | 0,27 | NR       |
| P128 | c.461G>T;p.Gly154Val              | Exon 5   | Missense   | 0,71 | NR       |
| P129 | c.526T>G ; p.Cys176Glu            | Exon 5   | Missense   | 0,72 | Positive |
| P130 | c.309C>G ; p.Tyr103*              | Exon 4   | Nonsense   | 0,14 | Positive |
| P131 | c.711G>T ; p.Met237Ile            | Exon 7   | Missense   | 0,75 | Negative |
| P132 | c.445_446insT ; p.Ser149fs        | Exon 5   | Frameshift | 0,43 | Positive |
| P133 | c.610G>T ; p.Glu204*              | Exon 6   | Nonsense   | 0,93 | NR       |
| P134 | c.974_984del ; p.Gly325fs         | Exon 9   | Frameshift | 0,42 | NR       |
| P135 | c.659A>G ; p.Tyr220Cys            | Exon 6   | Missense   | 0,76 | NR       |
| P136 | c.1025G>A ; p.Arg342Gln           | Exon 10  | Missense   | 0,35 | NR       |
| P137 | c.524 G>A ; p.Arg175His           | Exon 5   | Missense   | 0,42 | NR       |
| P138 | c.392A>T ; p.Asn131Ile            | Exon 5   | Missense   | 0,46 | NR       |
| P139 | c.439_449del ; p.p.Val147fs       | Exon 5   | Frameshift | 0,52 | NR       |
| P140 | c.645T>G ; p.Ser215Arg            | Exon 6   | Missense   | 0,70 | Negative |
| P141 | c.743 G>A ; p.Arg248Gln           | Exon 7   | Missense   | 0,80 | Positive |
| P142 | c.398T>G ; p.Met133Arg            | Exon 5   | Missense   | 0,35 | Positive |
| P143 | c.766_767insA ; p.Thr256_Leu257fs | Exon 7   | Frameshift | 0,54 | Positive |

|      |                           |          |            |      |          |
|------|---------------------------|----------|------------|------|----------|
| P144 | c.537T>A ; p.His179Gln    | Exon 5   | Missense   | 0,75 | NR       |
| P145 | c.955_956del ; p.Lys319fs | Exon 9   | Frameshift | 0,40 | Positive |
| P146 | c.517G>T ; p.Val173Leu    | Exon 5   | Missense   | 0,43 | Negative |
| P147 | c.376-2A>G                | Intron 4 | Splicing   | 0,70 | Positive |
| P148 | c.706T>C ; p.Tyr236His    | Exon 7   | Missense   | 0,35 | Positive |
| P149 | c.818G>T ; p.Arg273Leu    | Exon 8   | Missense   | 0,72 | NR       |
| P150 | c.824G>A ; p.Cys275Tyr    | Exon 8   | Missense   | 0,74 | Positive |
| P151 | c.824G>A ; p.Cys275Tyr    | Exon 8   | Missense   | 0,22 | Positive |
| P152 | c.396G>T ; p.Lys132Asn    | Exon 5   | Missense   | 0,64 | Positive |
| P153 | c.338T>C ; p.Phe113Ser    | Exon 4   | Missense   | 0,89 | Positive |
| P154 | c.713G>T ; p.Cys238Phe    | Exon 7   | Missense   | 0,33 | NR       |
| P155 | c.1010G>T ; p.Arg337Leu   | Exon 10  | Missense   | 0,52 | NR       |
| P156 | c.1024C>T ; p.Arg342*     | Exon 10  | Nonsense   | 0,19 | Positive |
| P157 | c.273G>A ; p.Trp91*       | Exon 4   | Nonsense   | 0,28 | Positive |
| P158 | c.734G>A ; p.Gly245Asp    | Exon 7   | Missense   | 0,39 | NR       |
| P159 | c.659A>G ; p.Tyr220Cys    | Exon 6   | Missense   | 0,72 | NR       |
| P160 | c.824G>A ; p.Cys275Tyr    | Exon 8   | Missense   | 0,62 | Positive |
| P161 | c.743 G>A ; p.Arg248Gln   | Exon 7   | Missense   | 0,53 | Positive |
| P162 | c.818 G>T ; p.Arg273Leu   | Exon 8   | Missense   | 0,48 | NR       |
| P163 | c.376-2A>G                | Intron 4 | Splicing   | 0,90 | Positive |
| P164 | c.818 G>A ; p.Arg273His   | Exon 8   | Missense   | 0,56 | NR       |
| P165 | c.637C>T ; p.Arg213*      | Exon 6   | Nonsense   | 0,71 | NR       |
| P166 | c.209_231del ; p.Ala70fs  | Exon 4   | Frameshift | 0,56 | NR       |
| P167 | c.818G>T ; p.Arg273Leu    | Exon 8   | Missense   | 0,23 | NR       |
| P168 | c.658T>C ; p.Tyr220His    | Exon 6   | Missense   | 0,60 | NR       |



A/

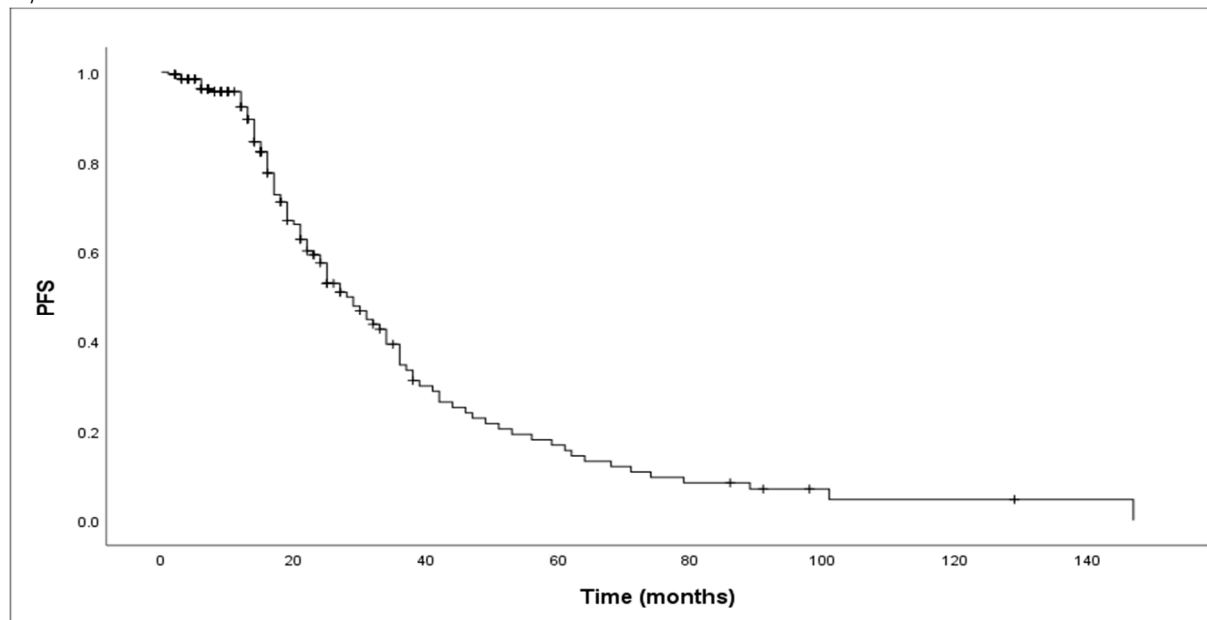

B/

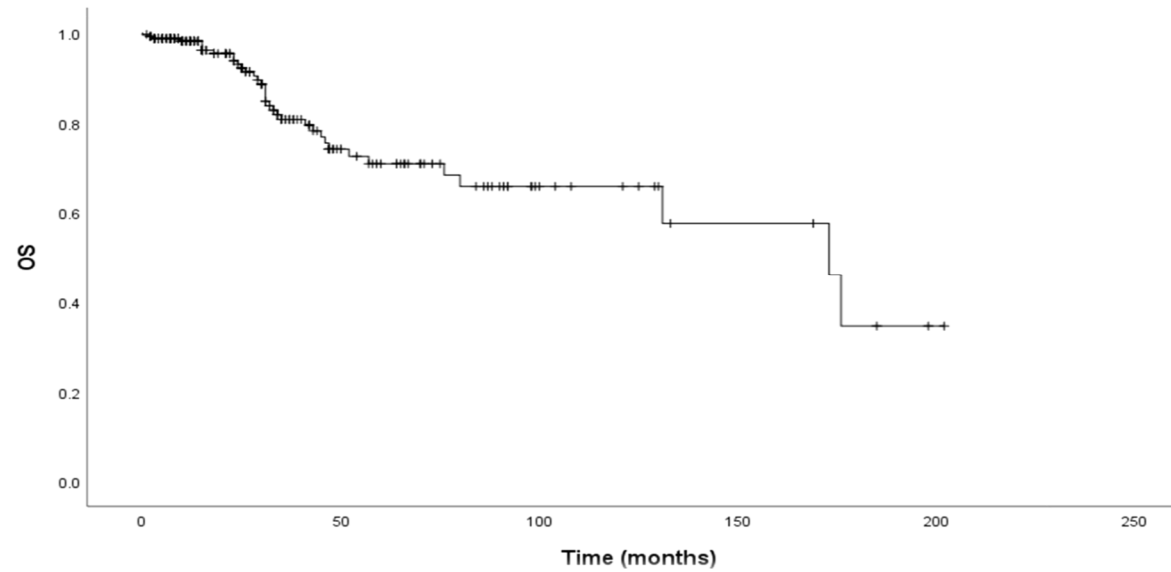

Supplementary Figure S1. A/ Progression free survival (PFS) curve oh the cohort. B/Overall survival (OS) curve of the cohort.
